# Supplementary material for: 9-Step synthesis of (−)-larikaempferic acid methyl ester enabled by skeletal rearrangement
Source: Chem Commun (Camb). 2024 May 9;60(56):7164–7. doi: 10.1039/d4cc01462f (PMC11232478; doi:10.1039/d4cc01462f)

## Supporting Information

### **9-Step Synthesis of (–)-Larikaempferic Acid Methyl Ester Enabled by Skeletal Rearrangement**

Mario E. Rivera, Lei Li, Aditya Kolisetti, Nina Chi, and Mingji Dai\*

Department of Chemistry, Emory University, Atlanta, GA 30322, United States  
Department of Pharmacology and Chemical Biology, Emory University, Atlanta, GA 30322,  
United States

## Table of Contents

|                                                                                        |            |
|----------------------------------------------------------------------------------------|------------|
| <b>Part 1. Experimental procedures and spectra data.....</b>                           | <b>S3</b>  |
| <b>Part 2. X-Ray structure and analysis data.....</b>                                  | <b>S15</b> |
| <b>Part 3. References.....</b>                                                         | <b>S17</b> |
| <b>Part 4. <math>^1\text{H}</math> and <math>^{13}\text{C}</math> NMR spectra.....</b> | <b>S18</b> |

## Part 1. Experimental Procedures and Experimental Data

**General Methods:** Reactions were performed using standard syringe techniques under argon atmosphere unless stated otherwise. Starting materials and reagents were used as received from suppliers. Dichloromethane ( $\text{CH}_2\text{Cl}_2$ ), acetonitrile (MeCN), tetrahydrofuran (THF), dimethylformamide (DMF), and toluene were purified by passing the previously degassed solvents through activated alumina columns. Flash chromatography was performed using silica gel (230-400 mesh). Thin layer chromatography (TLC) was performed using glass-backed silica plates (Silicycle). NMR spectra were recorded on a Bruker AV-400, 500 or 600 spectrometers at room temperature. Chemical shifts (in ppm) are given in reference to the solvent signal [ $^1\text{H}$  NMR:  $\text{CDCl}_3$  (7.26);  $^{13}\text{C}$  NMR:  $\text{CDCl}_3$  (77.16)].  $^1\text{H}$  NMR data are reported as follows: chemical shift ( $\delta$  ppm), multiplicity (s = singlet, d = doublet, t = triplet, q = quartet, quin = quintuplet, m = multiplet, br = broad), coupling constant (Hz), and integration.  $^{13}\text{C}$  NMR data are reported in terms of chemical shift and multiplicity. IR data were recorded on a Thermo Nicolet Nexus 470 FTIR. Room temperature is around 23 °C.

### Experimental Procedures

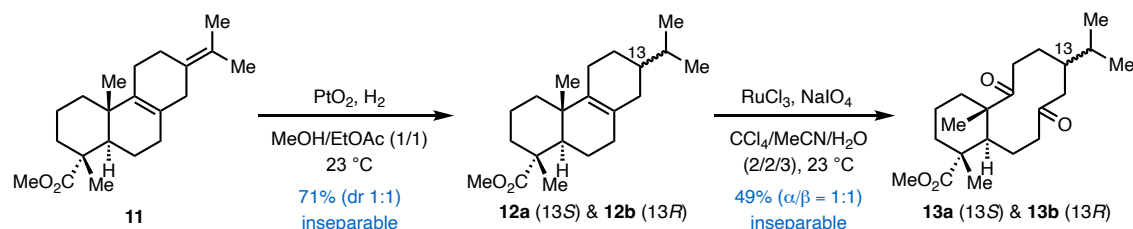

To a flame-dried 50 mL round bottom flask under an argon balloon was added diene **11**<sup>1</sup> (200 mg, 0.632 mmol, 1.0 equiv.) followed by a mixture (1:1) of anhydrous methanol (10 mL) and ethyl acetate (10 mL) at room temperature. PtO<sub>2</sub> (3.8 mg, 0.0126 mmol) was then added. The mixture was stirred for 5 min before the argon balloon was removed. The reaction mixture was bubbled with H<sub>2</sub> gas for 5 min then stirred under H<sub>2</sub> atmosphere overnight. After 16 h, the reaction mixture was filtered through a pad of celite and washed with ethyl acetate (3 x 15 mL). The resulting solution was concentrated in vacuo to yield a clear yellow oil which was purified via flash column chromatography (hexanes/ethyl acetate, 99:1 to 90:10) to obtain an inseparable mixture of isomers **12a/12b** together with over reduced byproducts (71% yield of **12a/12b** based on NMR analysis of this mixture). This mixture was not further purified and used directly in the next step.

To a flame-dried 250 mL round bottom flask, RuCl<sub>3</sub> (19.7 mg, 0.095 mmol, 5 mol %) was added and stirred in water (66 mL). In four 20-min intervals, NaIO<sub>4</sub> was added (1.0 g each, 2.5 equiv.). After the third interval, MeCN was added (45 mL) and subsequently the mixture of **12a/12b** (600 mg, 1.88 mmol), dissolved in CCl<sub>4</sub> (45 mL) was added dropwise. Once the NaIO<sub>4</sub> was added for the fourth time, the flask was fitted with a glass-stopper and left stirring at room temperature overnight. After 16 h, another 5.0 equiv. of NaIO<sub>4</sub> (2.01 g) was added in 2-hour intervals as 2.5 equiv. each interval. The reaction was then quenched with ethanol (11 mL), passed through a celite plug and extracted with DCM (70 mL). The organic layers were combined and washed once with sodium thiosulfate (150 mL), dried over anhydrous Na<sub>2</sub>SO<sub>4</sub>, filtered, concentrated, and purified via flash column chromatography (hexanes/ethyl acetate, 4:1 to 2:1) to give an inseparable mixture of **13a** and **13b** as a white amorphous solid (322 mg, 49%).

**13a** and **13b** were characterized as a 1:1 mixture with different conformers.

<sup>1</sup>H NMR (400 MHz, CDCl<sub>3</sub>) δ 3.79 (s, 3H), 3.78 (s, 3H), 2.88 (d, *J* = 8.0 Hz, 1H), 2.51-2.49 (m, 2H), 2.52-2.46 (m, 2H), 2.37-1.18 (m, 42H), 0.92-0.78 (m, 15H);

**<sup>13</sup>C NMR (101 MHz, CDCl<sub>3</sub>)** δ 217.1, 213.0, 178.9, 178.4, 53.5, 52.7, 52.3, 51.5, 48.1, 47.1, 46.7, 38.9, 36.9, 36.6, 35.9, 34.7, 33.5, 33.2, 29.8, 25.5, 24.8, 22.8, 22.4, 19.8, 19.7, 19.1, 19.0, 17.6, 17.4, 17.3, 16.5;

**HRMS (APCI):** *m/z* calc for C<sub>21</sub>H<sub>35</sub>O<sub>4</sub> <sup>+</sup>[M+H]<sup>+</sup>: 351.2530, found 351.2522;

**IR (film):** 2952, 2872, 1725, 1703, 1468, 1432, 1388, 1368, 1243, 1213, 1165, 1081, 1032 cm<sup>-1</sup>.

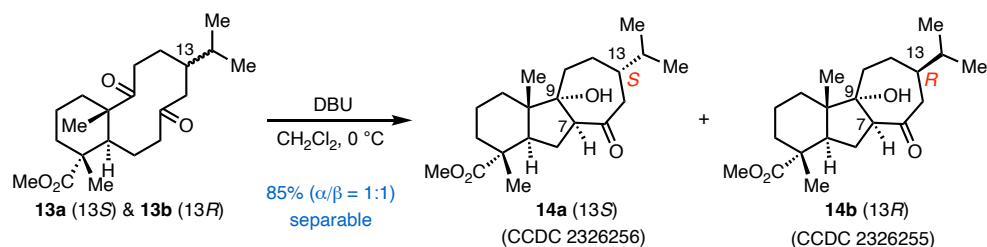

To a flamed-dried vial was added a 1:1 mixture of diketone **13a/13b** (255 mg, 0.728 mmol.) in CH<sub>2</sub>Cl<sub>2</sub> (8.0 mL) via syringe under argon atmosphere. The resulting solution was stirred at 0 °C for 15 min. DBU (0.135 mL, 0.904 mmol.) was added dropwise. The reaction was stirred at 0 °C. After 90 min, the reaction mixture was warmed to room temperature and quenched with saturated NH<sub>4</sub>Cl (3 mL, dropwise) and extracted with CH<sub>2</sub>Cl<sub>2</sub> (3 x 10 mL). The combined organic layers were dried over anhydrous Na<sub>2</sub>SO<sub>4</sub>, filtered, and concentrated in vacuo to obtain a white foamy solid which was purified via flash column chromatography (pentane/ethyl acetate, 4:1 to 2:1). Two separable isomers **14a** and **14b** (**14a:14b** = 1:1, total 216 mg, 85%) were obtained as white solids.

#### Compound 14a:

**<sup>1</sup>H NMR (400 MHz, CDCl<sub>3</sub>)** δ 3.64 (s, 3H), 3.06 (t, *J* = 8.6 Hz, 1H), 2.45 (d, *J* = 9.3 Hz, 2H), 2.25 (dd, *J* = 13.9, 5.7 Hz, 1H), 2.08 (ddd, *J* = 13.9, 12.2, 8.6 Hz, 1H), 1.90 – 1.81 (m, 1H), 1.76 – 1.56 (m, 8H), 1.52 (m, 1H), 1.46 – 1.36 (m, 3H), 1.28 (s, 3H), 0.90 (d, *J* = 6.9 Hz, 3H), 0.88 (d, *J* = 6.9 Hz, 3H), 0.77 (s, 3H);

**<sup>13</sup>C NMR (100 MHz, CDCl<sub>3</sub>)** δ 212.4, 178.9, 83.6, 61.6, 52.0, 49.5, 48.6, 45.7, 45.6, 45.2, 35.7, 33.9, 33.5, 31.5, 25.6, 25.0, 19.8, 19.3, 18.7, 17.5, 16.4;

**HRMS (APCI):** *m/z* calc for C<sub>21</sub>H<sub>35</sub>O<sub>4</sub> <sup>+</sup>[M+H]<sup>+</sup>: 351.2529, found 351.2522;

**IR (film):** 3472, 2951, 2923, 1725, 1701, 1455, 1385, 1235, 1187, 1136, 1088, 1052, 1007, 976, 943  $\text{cm}^{-1}$ .

**Compound 14b:**

**$^1\text{H}$  NMR (400 MHz,  $\text{CDCl}_3$ )**  $\delta$  3.64 (s, 3H), 3.16 (dd,  $J = 8.8, 7.6$  Hz, 1H), 2.42 (m, 1H), 2.29 (dd,  $J = 13.9, 5.6$  Hz, 1H), 2.23 – 2.13 (m, 2H), 1.86 (m, 1H), 1.72 (m, 1H), 1.66 – 1.40 (m, 11H), 1.27 (s, 3H), 0.92 (d,  $J = 6.7$  Hz, 3H), 0.89 (d,  $J = 6.7$  Hz, 3H), 0.68 (s, 3H);

**$^{13}\text{C}$  NMR (101 MHz,  $\text{CDCl}_3$ )**  $\delta$  211.9, 178.9, 84.0, 59.7, 52.0, 49.0, 45.5, 45.1, 44.6, 37.0, 35.9, 32.3, 30.9, 28.9, 25.6, 23.3, 19.9, 19.7, 18.6, 17.3, 15.9;

**HRMS (ESI):**  $m/z$  calc for  $\text{C}_{21}\text{H}_{34}\text{O}_4\text{Na}^+ [\text{M}+\text{Na}]^+$ : 373.2349, found 373.2346;

**IR (film):** 3492, 2951, 2923, 2868, 1725, 1698, 1456, 1386, 1368, 1329, 1243, 1164, 1140, 1116, 1051, 996, 940, 908  $\text{cm}^{-1}$ .

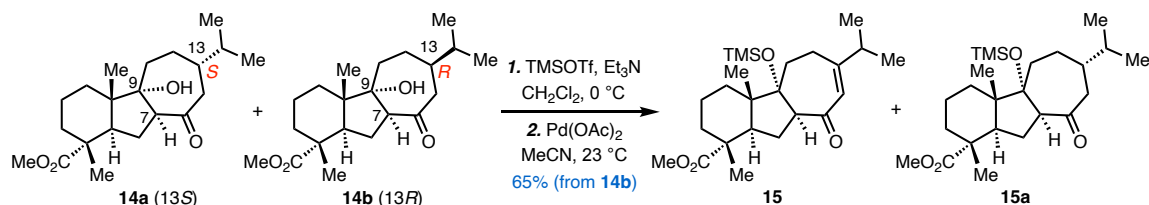

To a flame-dried vial under argon atmosphere, was added a 1:1 mixture of **14a** and **14b** (116 mg, 0.33 mmol,) and  $\text{CH}_2\text{Cl}_2$  (7 mL). The mixture was stirred at 0 °C for 10 min. Anhydrous triethylamine (0.369 mL, 2.65 mmol, 8.0 equiv.) was added followed by dropwise addition of TMSOTf (0.240 mL, 1.32 mmol, 4.0 equiv.). This mixture was stirred at 0 °C for 1 h before it was warmed to room temperature, and quenched with saturated  $\text{NaHCO}_3$  (4 mL), extracted with  $\text{CH}_2\text{Cl}_2$  (3 x 5 mL). The organic layers were dried with anhydrous  $\text{Na}_2\text{SO}_4$ , filtered, and concentrated in vacuo to give a clear oil which was used in the next step without further purification.

The above crude silyl enol ether intermediate was flushed with argon and dissolved in MeCN (9 mL).  $\text{Pd}(\text{OAc})_2$  (133 mg, 0.592 mmol.) was quickly added. The reaction mixture was stirred overnight at room temperature before it was filtered through celite, washed with ethyl acetate,

concentrated, and purified via flash column chromatography (hexanes/ethyl acetate, 3:1) to yield a yellow oil that crystallized to a yellow-white solid **15** (45 mg, 65% from **14b**) and protected alcohol **15a** (56 mg, 71% from **14a**).

**Compound 15:**

**<sup>1</sup>H NMR (400 MHz, CDCl<sub>3</sub>)**  $\delta$  5.94 (d,  $J$  = 2.6 Hz, 1H), 3.64 (s, 3H), 2.99 (m, 1H), 2.67 (ddt,  $J$  = 19.0, 11.0, 1.9 Hz, 1H), 2.40 – 2.32 (m, 3H), 2.27 (m, 1H), 1.76 (ddd,  $J$  = 13.9, 6.3, 1.9 Hz, 1H), 1.69 – 1.52 (m, 7H), 1.43 (m, 1H), 1.28 (s, 3H), 1.09 (d,  $J$  = 6.8 Hz, 3H), 1.07 (d,  $J$  = 6.8 Hz, 3H), 0.66 (s, 3H), 0.19 (s, 9H);

**<sup>13</sup>C NMR (101 MHz, CDCl<sub>3</sub>)**  $\delta$  201.7, 178.9, 165.5, 126.6, 89.7, 62.4, 51.8, 49.5, 45.6, 45.0, 37.38, 36.0, 33.3, 31.5, 28.3, 23.1, 21.7, 21.2, 18.8, 17.0, 16.6, 2.70;

**HRMS (APCI):**  $m/z$  calc for C<sub>24</sub>H<sub>41</sub>O<sub>4</sub>Si<sup>+</sup> [M+H]<sup>+</sup>: 421.2768, found 421.2773;

**IR (film):** 2950, 2922, 1727, 1664, 1457, 1386, 1322, 1248, 1219, 1183, 1162, 1087, 1057, 1020, 996, 856, 838, 753, 408 cm<sup>-1</sup>.

**Compound 15a:**

**<sup>1</sup>H NMR (400 MHz, CDCl<sub>3</sub>)**  $\delta$  3.64 (s, 3H), 3.14 (t,  $J$  = 8.4 Hz, 1H), 2.47 – 2.37 (m, 2H), 2.27 (dd,  $J$  = 14.0, 6.0 Hz, 1H), 2.08 (ddd,  $J$  = 14.0, 12.4, 8.2 Hz, 1H), 1.80 – 1.56 (m, 8H), 1.56 – 1.36 (m, 3H), 1.31 (m, 1H), 1.27 (s, 3H), 1.24 (m, 1H), 0.90 (d,  $J$  = 6.8 Hz, 3H), 0.88 (d,  $J$  = 6.8 Hz, 3H), 0.74 (s, 3H), 0.23 (s, 9H);

**<sup>13</sup>C NMR (101 MHz, CDCl<sub>3</sub>)**  $\delta$  212.2, 179.0, 88.8, 62.3, 51.8, 49.7, 49.6, 45.6, 45.4, 45.2, 36.0, 33.6, 33.5, 32.2, 29.8, 26.2, 24.8, 19.7, 19.2, 18.8, 17.3, 16.6, 3.0;

**HRMS (ESI):**  $m/z$  calc for C<sub>24</sub>H<sub>42</sub>O<sub>3</sub>NaSi<sup>+</sup> [M+Na]<sup>+</sup>: 445.2744, found 445.2742;

**IR (film):** 2952, 2917, 2849, 1727, 1704, 1461, 1386, 1250, 1146, 1118, 1080, 1023, 866, 838, 738 cm<sup>-1</sup>.

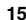

16

**<sup>13</sup>C NMR (101 MHz, CDCl<sub>3</sub>)** δ 201.6, 178.9, 166.4, 126.5, 84.6, 61.8, 52.0, 48.6, 45.6, 45.3, 37.5, 35.8, 33.4, 31.1, 27.6, 23.0, 21.6, 21.2, 18.7, 17.2, 16.3;

**IR (film):** 3479, 2920, 2869, 1725, 1644, 1456, 1432, 1385, 1327, 1296, 1236, 1220, 1181, 1113, 1070, 1051, 1031, 980, 920, 890, 856 cm<sup>-1</sup>.

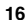

To a flame dried vial containing alcohol **16** (17 mg, 0.05 mmol, 1.0 equiv.) under argon atmosphere was added CH<sub>2</sub>Cl<sub>2</sub> (0.5 mL). The mixture was stirred at 0 °C for 5 min before *p*-TsOH (8.4 mg, 0.05 mmol, 1.0 equiv.) in CH<sub>2</sub>Cl<sub>2</sub> (0.5 mL) was added dropwise. The reaction mixture was first stirred at 0 °C for 30 min, then warmed up to room temperature for 1 h until complete consumption of starting material. Reaction mixture was quenched with aqueous sodium bicarbonate (0.5 mL) and extracted with dichloromethane (3 x 2 mL). The combined organic layers were washed with brine, dried over anhydrous Na<sub>2</sub>SO<sub>4</sub>, filtered, and concentrated. The residue was purified via flash column chromatography (hexane/ethyl acetate, 3:1) to afford **17** a yellowish foamy solid (11.3 mg, 70%).

**<sup>1</sup>H NMR (400 MHz, CDCl<sub>3</sub>)**  $\delta$  5.99 (d, *J* = 0.9 Hz, 1H), 3.66 (s, 3H), 2.46 – 2.38 (m, 2H), 2.38 – 2.29 (m, 4H), 2.04 (dd, *J* = 11.8, 6.5 Hz, 1H), 1.84 – 1.63 (m, 5H), 1.40 (m, 1H), 1.29 (s, 3H), 1.09 – 1.07 (m, 6H), 0.96 (s, 3H);

**<sup>13</sup>C NMR (101 MHz, CDCl<sub>3</sub>)**  $\delta$  190.9, 178.2, 166.5, 162.1, 138.4, 127.7, 52.1, 51.8, 50.4, 45.4, 38.5, 35.9, 34.3, 30.4, 29.6, 24.4, 21.1, 20.9, 19.0, 17.8, 16.9;

**HRMS (APCI):** *m/z* calc for C<sub>21</sub>H<sub>31</sub>O<sub>3</sub><sup>+</sup> [M+H]<sup>+</sup>: 331.2267, found 331.2267;

**IR (film):** 2918, 2849, 1726, 1640, 1600, 1453, 1377, 1249, 1172, 1121, 1057, 887, 886 cm<sup>-1</sup>.

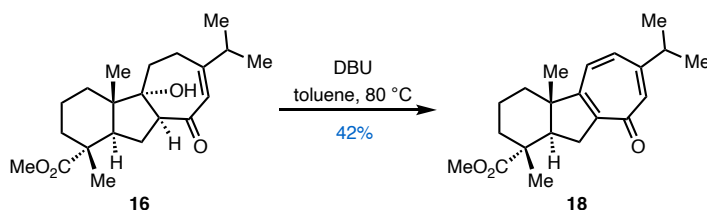

In a flame dried microwave vial containing alcohol **16** (5 mg, 0.014 mmol) under argon atmosphere was added toluene (500  $\mu$ L) at room temperature. After 5 min, DBU (9.2  $\mu$ L, 0.03 mmol, 2.0 equiv.) was added. The reaction mixture was heated to 80 °C and stirred overnight before it was cooled to room temperature, quenched with aqueous NH<sub>4</sub>Cl (400  $\mu$ L), and extracted with CH<sub>2</sub>Cl<sub>2</sub> (3 x 1 mL). Organic layers were washed with brine, dried over anhydrous Na<sub>2</sub>SO<sub>4</sub>, filtered and concentrated.

Residue was purified via flash column chromatography (hexanes/ethyl acetate, 4:1 to 1:1) to afford **18** as a clear oil (2.2 mg, 42%)

**<sup>1</sup>H NMR (400 MHz, CDCl<sub>3</sub>)**  $\delta$  7.03 (s, 1H), 6.93 (d,  $J$  = 11.3 Hz, 1H), 6.83 (d,  $J$  = 11.3 Hz, 1H), 3.67 (s, 3H), 2.81 – 2.64 (m, 3H), 2.18 (dd,  $J$  = 12.3, 6.5 Hz, 1H), 1.95 (m, 1H), 1.86 – 1.79 (m, 3H), 1.69 (m, 1H), 1.56 (m, 1H), 1.34 (s, 3H), 1.21 (d,  $J$  = 6.9 Hz, 6H), 1.08 (m, 3H);

**<sup>13</sup>C NMR (101 MHz, CDCl<sub>3</sub>)**  $\delta$  185.3, 178.0, 159.1, 155.8, 153.0, 138.4, 135.9, 129.5, 52.2, 51.2, 49.7, 45.2, 38.7, 35.8, 35.0, 32.3, 23.2, 23.1, 20.5, 19.1, 16.6;

**HRMS (APCI):**  $m/z$  calc for C<sub>21</sub>H<sub>29</sub>O<sub>3</sub><sup>+</sup> [M+H]<sup>+</sup>: 329.2111, found 329.2111;

**IR (film):** 2925, 2869, 1724, 1617, 1562, 1474, 1364, 1249, 1173, 1125, 1103, 1056, cm<sup>-1</sup>.

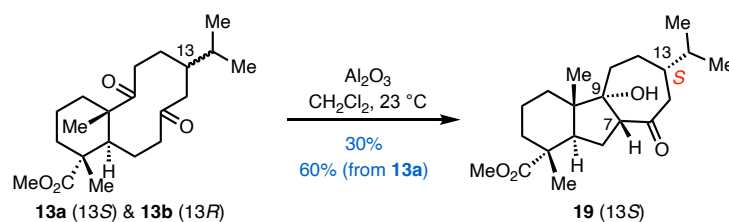

A mixture of the diketones **13a/13b** (98 mg, 1:1, 0.28 mmol) and basic alumina (1.0 g) in dichloromethane (10 mL) was stirred at room temperature under argon for 16 h. The alumina was removed by filtration and washed with several portions of dichloromethane. The combined filtrates were concentrated under reduced pressure. The resulting oil was purified via flash column chromatography (hexanes/ethyl acetate, 4:1 to 1:1) to give a clear oil which was crystallized to give **19** as a white solid (29.5 mg, 30%; 60% from **13a**). Note: **13b** decomposed under the conditions.

**<sup>1</sup>H NMR (400 MHz, CDCl<sub>3</sub>)**  $\delta$  3.69 (s, 3H), 3.38 (dd,  $J$  = 10.6, 3.4 Hz, 1H), 2.40 (ddd,  $J$  = 18.6, 3.3, 1.9 Hz, 1H), 2.33 – 2.18 (m, 3H), 1.82 – 1.70 (m, 4H), 1.69 – 1.58 (m, 5H), 1.53 (m, 1H), 1.47 – 1.38 (m, 2H), 1.31 – 1.25 (m, 2H), 1.22 (s, 3H), 0.93 (s, 4H), 0.88 (d,  $J$  = 6.6 Hz, 3H), 0.86 (d,  $J$  = 6.6 Hz, 3H);

$^{13}\text{C}$  NMR (101 MHz,  $\text{CDCl}_3$ )  $\delta$  211.3, 178.5, 84.0, 55.8, 52.2, 49.9, 47.0, 45.9, 45.3, 40.7, 35.7, 34.6, 34.2, 30.0, 28.0, 22.5, 19.1, 18.8, 18.6, 17.3, 16.9;

HRMS (ESI):  $m/z$  calc for  $\text{C}_{21}\text{H}_{34}\text{O}_4\text{Na}^+ [\text{M}+\text{Na}]^+$ : 373.2349, found 373.2345;

IR (film): 2950, 2923, 1726, 1663, 1455, 1385, 1293, 1248, 1183, 1108, 1054, 938, 856, 838,  $753\text{ cm}^{-1}$ .

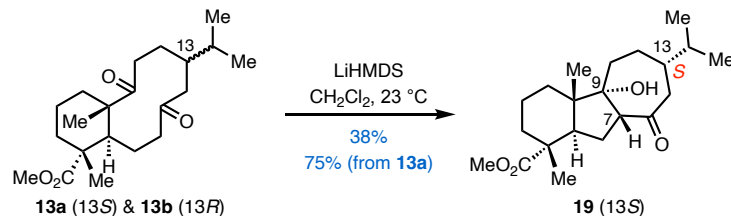

To a flamed-dried vial containing a mixture (1:1) of **13a/13b** (95 mg, 0.27 mmol) was added  $\text{CH}_2\text{Cl}_2$  (3 mL). The solution was stirred at 0 °C for 5 min, then lithium bis(trimethylsilyl)amide (1 M in THF, 542  $\mu\text{L}$ , 542  $\mu\text{mol}$ , 2 equiv.) was added dropwise. The reaction was warmed to 23 °C and stirred for 16 h. The reaction mixture was then placed at 0 °C and stirred for 5 min before it was quenched with saturated  $\text{NH}_4\text{Cl}$  (1 mL) and extracted with  $\text{CH}_2\text{Cl}_2$  (3 x 5 mL). The combined organic layers were washed with brine, dried over anhydrous  $\text{Na}_2\text{SO}_4$ , filtered, and concentrated. The resulting pale yellow-brown oil was purified via flash column chromatography (hexanes/ethyl acetate, 4:1 to 1:1) to give a white solid **19** (35.5 mg, 38%; 75% from **13a**).

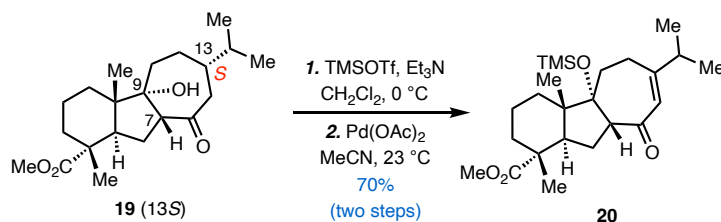

To a flamed-dried vial containing alcohol **19** (61.5 mg, 0.175 mmol) under argon atmosphere was added  $\text{CH}_2\text{Cl}_2$  (3.5 mL). The solution was stirred at 0 °C for 5 min before triethylamine (978  $\mu\text{L}$ , 7.02 mmol, 40.0 equiv.) was added followed by TMSOTf (637  $\mu\text{L}$ , 3.51 mmol, 20.0 equiv.) dropwise. The reaction mixture was stirred for 1 h at 0 °C before it was quenched with sodium

bicarbonate (1.5 mL) and extracted with CH<sub>2</sub>Cl<sub>2</sub> (3 x 2 mL). The combined organic layers were dried over anhydrous Na<sub>2</sub>SO<sub>4</sub>, filtered and concentrated to give a yellow color oil which was used in the next step without further purification.

The above crude silyl enol ether intermediate was flushed with argon and dissolved in MeCN (3.5 mL). Pd(OAc)<sub>2</sub> (43.4 mg, 0.193 mmol) was quickly added. The reaction was stirred overnight at room temperature. The reaction mixture was then filtered through a pad of celite, washed with EtOAc, concentrated, and purified via flash column chromatography (hexanes/ethyl acetate, 4:1 to 1:1) to yield a clear oil **20** (52 mg, 70% over two steps).

**<sup>1</sup>H NMR (400 MHz, CDCl<sub>3</sub>)**  $\delta$  5.97 (s, 1H), 3.67 (s, 3H), 3.20 (dd,  $J$  = 10.5, 5.5 Hz, 1H), 2.51 (dd,  $J$  = 11.4, 8.9 Hz, 1H), 2.48 – 2.38 (m, 3H), 2.34 – 2.23 (m, 2H), 1.79 – 1.53 (m, 6H), 1.49 – 1.37 (m, 2H), 1.20 (s, 3H), 1.08 (d,  $J$  = 6.9 Hz, 6H, 2Me), 0.91 (s, 3H), 0.03 (s, 9H);

**<sup>13</sup>C NMR (101 MHz, CDCl<sub>3</sub>)**  $\delta$  199.5, 178.6, 164.0, 128.6, 89.1, 58.2, 52.0, 51.3, 46.1, 45.4, 39.1, 35.7, 33.1, 30.9, 30.2, 20.91, 20.90, 20.8, 18.6, 17.4, 16.5, 2.9;

**HRMS (ESI):**  $m/z$  calc for C<sub>24</sub>H<sub>40</sub>O<sub>4</sub>SiNa<sup>+</sup> [M+Na]<sup>+</sup>: 443.2588, found 443.2585;

**IR (film):** 2950, 2923, 1726, 1663, 1455, 1385, 1293, 1248, 1183, 1108, 1054, 938, 856, 838, 753 cm<sup>-1</sup>.

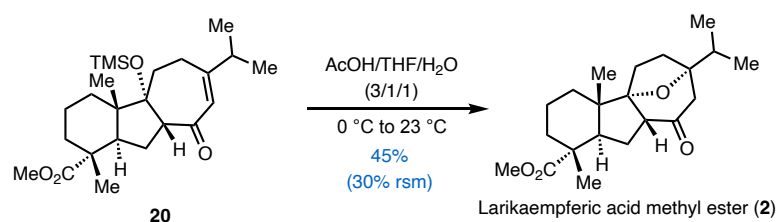

To a flame-dried vial containing enone **20** (25 mg, 0.059 mmol) under argon atmosphere was added THF (1 mL), distilled water (1 mL) and acetic acid (3 mL). This mixture was stirred at room temperature overnight. After 18 h, saturated NaHCO<sub>3</sub> was added. The mixture extracted with ethyl acetate (3 x 4 mL). The combined organic layers were washed with brine and dried over anhydrous Na<sub>2</sub>SO<sub>4</sub>, filtered, and concentrated. The resulting residue was purified via flash column

chromatography (hexane/ethyl acetate, 6:1 to 4:1) to produce larikaempferic acid methyl ester (**2**) (8 mg, 45%) as a clear oil with 30% recovered of starting material.

**<sup>1</sup>H NMR (400 MHz, CDCl<sub>3</sub>)**  $\delta$  3.62 (s, 3H), 2.54 (dd,  $J$  = 12.5, 4.1 Hz, 1H), 2.48 (dd,  $J$  = 12.5, 8.0 Hz, 1H), 2.42 (d,  $J$  = 17.6 Hz, 1H), 2.34 (d,  $J$  = 17.6 Hz, 1H), 2.05 (q,  $J$  = 12.5 Hz, 1H), 1.95 – 1.82 (m, 2H), 1.80 – 1.69 (m, 3H), 1.69 – 1.63 (m, 3H), 1.63 – 1.59 (m, 2H), 1.55 (m, 1H), 1.35 (m, 1H), 1.19 (s, 3H), 0.90 (d,  $J$  = 6.8 Hz, 3H), 0.88 (d,  $J$  = 6.8 Hz, 3H), 0.87 (s, 3H);

**<sup>13</sup>C NMR (101 MHz, CDCl<sub>3</sub>)**  $\delta$  214.2, 178.6, 92.1, 83.2, 54.5, 52.0, 50.4, 47.6, 46.0, 45.5, 36.4, 35.8, 30.8, 30.6, 29.1, 28.3, 18.3, 17.6, 17.5, 16.7, 16.5;

**HRMS (APCI):**  $m/z$  calc for C<sub>21</sub>H<sub>33</sub>O<sub>4</sub> <sup>+</sup>[M+H]<sup>+</sup>: 349.2373, found 349.2376;

**IR (film):** 2922, 2854, 1726, 1705, 1455, 1384, 1244, 1172, 1136, 1110, 1075, 1026, 938, 860, 801cm<sup>-1</sup>;

**[ $\alpha$ ]<sub>D</sub><sup>23</sup>** = –84.9 ( $c$  0.1, CHCl<sub>3</sub>).

**Table 1.** <sup>1</sup>H and <sup>13</sup>C NMR comparison of natural and synthetic larikaempferic acid methyl ester (**2**).

| Position   | <sup>1</sup> H NMR<br>$\delta$ (ppm), multiplicity, ( $J$ in Hz) |                        | <sup>13</sup> C NMR<br>$\delta$ (ppm) |                        |
|------------|------------------------------------------------------------------|------------------------|---------------------------------------|------------------------|
|            | Reference <sup>(2)</sup><br>(500 MHz)                            | Synthetic<br>(400 MHz) | Reference <sup>(2)</sup><br>125 MHz   | Synthetic<br>(101 MHz) |
| 1 $\alpha$ | 1.73, m                                                          | 1.73, m                | 29.0                                  | 29.1                   |
| 1 $\beta$  | 1.36, dt (12.0, 3.0)                                             | 1.35, m                | -                                     | -                      |
| 2          | 1.67 (2H), m                                                     | 1.67 (2H), m           | 18.1                                  | 18.3                   |
| 3 $\alpha$ | 1.73, m                                                          | 1.73, m                | 35.7                                  | 35.8                   |
| 3 $\beta$  | 1.65, m                                                          | 1.64, m                | -                                     | -                      |

|             |                      |                      |       |       |
|-------------|----------------------|----------------------|-------|-------|
| 4           | -                    | -                    | 45.3  | 45.5  |
| 5 $\alpha$  | 2.48, dd (12.5, 8.0) | 2.48, dd (12.5, 8.0) | 47.4  | 47.6  |
| 6 $\alpha$  | 1.65, m              | 1.64, m              | 28.1  | 28.3  |
| 6 $\beta$   | 2.04, quartet (12.5) | 2.05, quartet (12.5) | -     | -     |
| 7 $\beta$   | 2.55, dd (12.5, 4.5) | 2.54, dd (12.5, 4.1) | 54.3  | 54.5  |
| 8           | -                    | -                    | 214.0 | 214.2 |
| 9           | -                    | -                    | 92.0  | 92.1  |
| 10          | -                    | -                    | 45.9  | 46.0  |
| 11 $\alpha$ | 1.73, m              | 1.73, m              | 30.4  | 30.6  |
| 11 $\beta$  | 1.58, m              | 1.56, m              | -     | -     |
| 12 $\alpha$ | 1.73, m              | 1.73, m              | 30.6  | 31.0  |
| 12 $\beta$  | 1.89, m              | 1.89, m              | -     | -     |
| 13          | -                    | -                    | 83.0  | 83.2  |
| 14 $\alpha$ | 2.35, br d (17.0)    | 2.34, d (17.6)       | 50.2  | 50.4  |
| 14 $\beta$  | 2.42, d (17.0)       | 2.42, d (17.6)       |       | -     |
| 15          | 1.89, septet (6.5)   | 1.89, m              | 36.2  | 36.4  |
| 16          | 0.89, d (6.5)        | 0.88, d (6.8)        | 16.3  | 16.4  |
| 17          | 0.90, d (6.5)        | 0.90, d (6.8)        | 17.3  | 17.5  |
| 18          | -                    | -                    | 178.4 | 178.6 |
| 19          | 1.20, s              | 1.19, s              | 16.5  | 16.7  |
| 20          | 0.88, s              | 0.87, s              | 17.4  | 17.6  |
| COOMe       | 3.63, s              | 3.62, s              | 51.8  | 52.0  |

## Part 2. X-ray and Structural Analysis

### Compound 14a

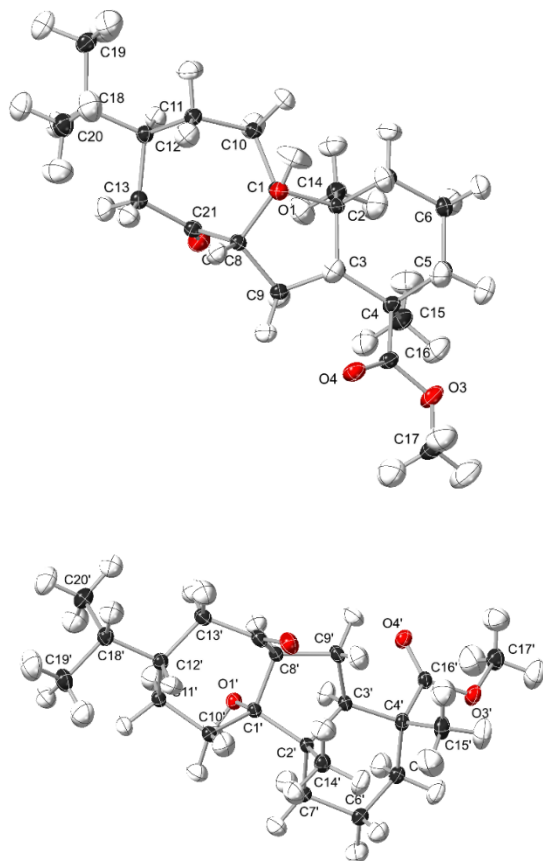

**Crystal Data.**  $C_{21}H_{32}O_4$ ,  $M_r = 348.486$ , orthorhombic,  $P2_12_12_1$  (No. 19),  $a = 9.4597(1) \text{ \AA}$ ,  $b = 13.7995(1) \text{ \AA}$ ,  $c = 15.0329(1) \text{ \AA}$ ,  $a = b = c = 90^\circ$ ,  $V = 1962.38(3) \text{ \AA}^3$ ,  $T = 99.97(16) \text{ K}$ ,  $Z = 4$ ,  $Z' = 1$ ,  $m(\text{Cu K}\alpha) = 0.637$ , 20958 reflections measured, 4065 unique ( $R_{\text{int}} = 0.0460$ ) which were used in all calculations. The final  $wR_2$  was 0.0633 (all data) and  $R_1$  was 0.0258 ( $I \geq 2 \sigma(I)$ ).

|                                       |                                |
|---------------------------------------|--------------------------------|
| CCDC number                           | 2326256                        |
| Formula                               | $C_{21}H_{34}O_4$              |
| $D_{\text{calc.}} / \text{g cm}^{-3}$ | 1.195                          |
| $m/\text{mm}^{-1}$                    | 0.642                          |
| Formula Weight                        | 350.502                        |
| Color                                 | colorless                      |
| Shape                                 | needle-shaped                  |
| Size/ $\text{mm}^3$                   | $0.30 \times 0.23 \times 0.19$ |
| $T/\text{K}$                          | 100.02(10)                     |
| Crystal System                        | monoclinic                     |
| Flack Parameter                       | -0.07(6)                       |
| Hooft Parameter                       | -0.07(6)                       |
| Space Group                           | $I2$                           |
| $a/\text{\AA}$                        | 20.0209(2)                     |
| $b/\text{\AA}$                        | 6.9482(1)                      |
| $c/\text{\AA}$                        | 29.3036(2)                     |
| $a^\circ$                             | 90                             |
| $b^\circ$                             | 107.026(1)                     |
| $g^\circ$                             | 90                             |
| $V/\text{\AA}^3$                      | 3897.74(8)                     |
| $Z$                                   | 8                              |
| $Z'$                                  | 2                              |
| Wavelength/ $\text{\AA}$              | 1.54184                        |
| Radiation type                        | Cu $K_\alpha$                  |
| $Q_{\text{min}}^\circ$                | 3.15                           |
| $Q_{\text{max}}^\circ$                | 72.49                          |
| Measured Refl's.                      | 27039                          |
| Indep't Refl's                        | 7060                           |
| Refl's $I \geq 2 \sigma(I)$           | 6876                           |
| $R_{\text{int}}$                      | 0.0421                         |
| Parameters                            | 1064                           |
| Restraints                            | 1099                           |
| Largest Peak                          | 0.1121                         |
| Deepest Hole                          | -0.1056                        |
| GooF                                  | 1.0912                         |
| $wR_2$ (all data)                     | 0.0605                         |
| $wR_2$                                | 0.0601                         |
| $R_1$ (all data)                      | 0.0258                         |
| $R_1$                                 | 0.0251                         |

# Compound 14b

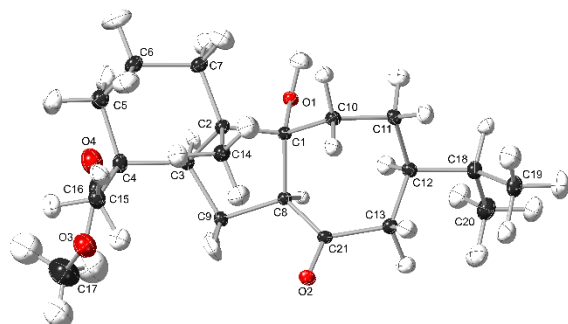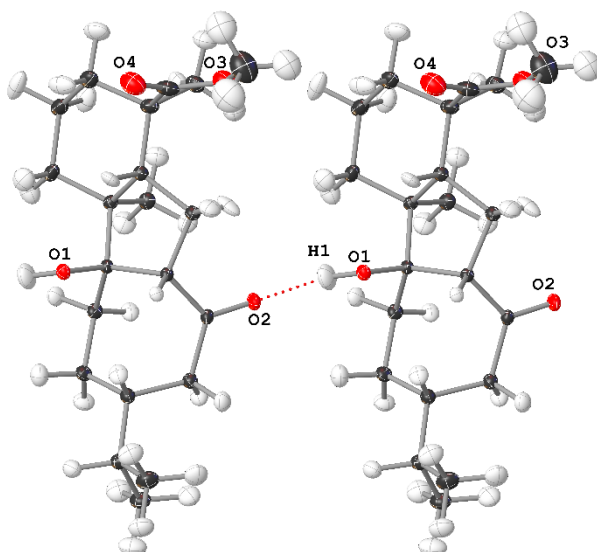

|                                                        |                                                                                |
|--------------------------------------------------------|--------------------------------------------------------------------------------|
| CCDC number                                            | 2326255                                                                        |
| Empirical formula                                      | C <sub>21</sub> H <sub>34</sub> O <sub>4</sub>                                 |
| Formula weight                                         | 350.502                                                                        |
| Temperature [K]                                        | 100(2)                                                                         |
| Crystal system                                         | orthorhombic                                                                   |
| Space group (number)                                   | <i>P</i> 2 <sub>1</sub> 2 <sub>1</sub> 2 <sub>1</sub> (19)                     |
| <i>a</i> [Å]                                           | 6.9015(1)                                                                      |
| <i>b</i> [Å]                                           | 11.1195(1)                                                                     |
| <i>c</i> [Å]                                           | 24.8315(3)                                                                     |
| $\alpha$ [°]                                           | 90                                                                             |
| $\beta$ [°]                                            | 90                                                                             |
| $\gamma$ [°]                                           | 90                                                                             |
| Volume [Å <sup>3</sup> ]                               | 1905.60(4)                                                                     |
| <i>Z</i>                                               | 4                                                                              |
| $\rho_{\text{calc}}$ [g cm <sup>-3</sup> ]             | 1.222                                                                          |
| $\mu$ [mm <sup>-1</sup> ]                              | 0.656                                                                          |
| <i>F</i> (000)                                         | 770.451                                                                        |
| Crystal size [mm <sup>3</sup> ]                        | 0.23×0.35×0.37                                                                 |
| Crystal colour                                         | colorless                                                                      |
| Crystal shape                                          | prism                                                                          |
| Radiation                                              | Cu <i>K</i> $\alpha$ ( $\lambda$ =1.54178 Å)                                   |
| 2 $\theta$ range [°]                                   | 7.12 to 147.40 (0.80 Å)                                                        |
| Index ranges                                           | −8 ≤ <i>h</i> ≤ 8<br>−13 ≤ <i>k</i> ≤ 13<br>−30 ≤ <i>l</i> ≤ 18                |
| Reflections collected                                  | 20285                                                                          |
| Independent reflections                                | 3712<br><i>R</i> <sub>int</sub> = 0.0306<br><i>R</i> <sub>sigma</sub> = 0.0170 |
| Completeness to<br>$\theta$ = 67.6840°                 | 99.1 %                                                                         |
| Data / Restraints /<br>Parameters                      | 3712 / 600 / 683                                                               |
| Goodness-of-fit on <i>F</i> <sup>2</sup>               | 1.1437                                                                         |
| Final <i>R</i> indexes<br>[ <i>I</i> ≥ 2σ( <i>I</i> )] | <i>R</i> <sub>1</sub> = 0.0170<br><i>wR</i> <sub>2</sub> = 0.0433              |
| Final <i>R</i> indexes<br>[all data]                   | <i>R</i> <sub>1</sub> = 0.0171<br><i>wR</i> <sub>2</sub> = 0.0434              |
| Largest peak/hole [e Å <sup>-3</sup> ]                 | 0.12/−0.08                                                                     |
| Extinction coefficient                                 | 0.0011                                                                         |
| Flack <i>X</i> parameter                               | 0.02(4)                                                                        |

# Compound 19

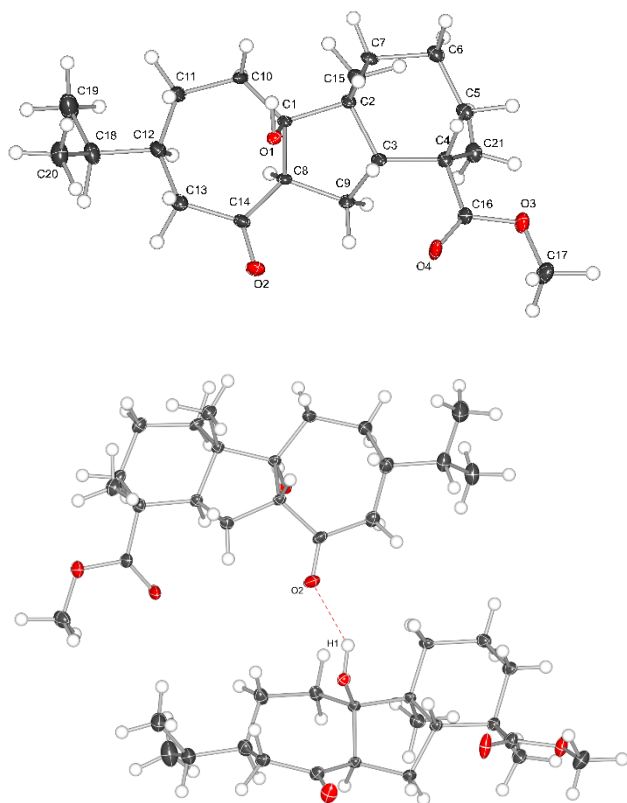

|                                             |                                                                    |
|---------------------------------------------|--------------------------------------------------------------------|
| CCDC number                                 | 2326254                                                            |
| Empirical formula                           | C <sub>42</sub> H <sub>68</sub> O <sub>8</sub>                     |
| Formula weight                              | 701.003                                                            |
| Temperature/K                               | 105(8)                                                             |
| Crystal system                              | monoclinic                                                         |
| Space group                                 | P2 <sub>1</sub>                                                    |
| a/Å                                         | 6.1621(4)                                                          |
| b/Å                                         | 11.6465(6)                                                         |
| c/Å                                         | 13.7206(9)                                                         |
| α/°                                         | 90                                                                 |
| β/°                                         | 102.517(6)                                                         |
| γ/°                                         | 90                                                                 |
| Volume/Å <sup>3</sup>                       | 961.28(10)                                                         |
| Z                                           | 1                                                                  |
| ρ <sub>calc</sub> /cm <sup>3</sup>          | 1.211                                                              |
| μ/mm <sup>-1</sup>                          | 0.650                                                              |
| F(000)                                      | 385.2                                                              |
| Crystal size/mm <sup>3</sup>                | 0.28 × 0.08 × 0.07                                                 |
| Radiation                                   | Cu Kα (λ = 1.54184)                                                |
| 2θ range for data collection/°              | 10.06 to 145.94                                                    |
| Index ranges                                | -7 ≤ h ≤ 7<br>-13 ≤ k ≤ 13<br>-16 ≤ l ≤ 16                         |
| Reflections collected                       | 11114                                                              |
| Independent reflections                     | 3443<br>[R <sub>int</sub> = 0.0552<br>R <sub>sigma</sub> = 0.0494] |
| Data/restraints/parameters                  | 3443/867/405                                                       |
| Goodness-of-fit on F <sup>2</sup>           | 1.055                                                              |
| Final R indexes [I ≥ 2σ (I)]                | R <sub>1</sub> = 0.0649<br>wR <sub>2</sub> = 0.1264                |
| Final R indexes [all data]                  | R <sub>1</sub> = 0.0657<br>wR <sub>2</sub> = 0.1268                |
| Largest diff. peak/hole / e Å <sup>-3</sup> | 0.37/-0.39                                                         |
| Flack parameter                             | -0.26(13)                                                          |

### Part 3. References

1. A. Abad, M. Arnó, L.R. Domingo, R.J. Zaragozá. *Tetrahedron*, 1985, **41**, 4937–4940.
2. H. Ohtsu, R. Tanaka, S. Matsunaga, H. Tokuda, H. Nishino, *Planta Med.*, 1999, **65**, 664–666.

## Part 4. $^1\text{H}$ and $^{13}\text{C}$ NMR

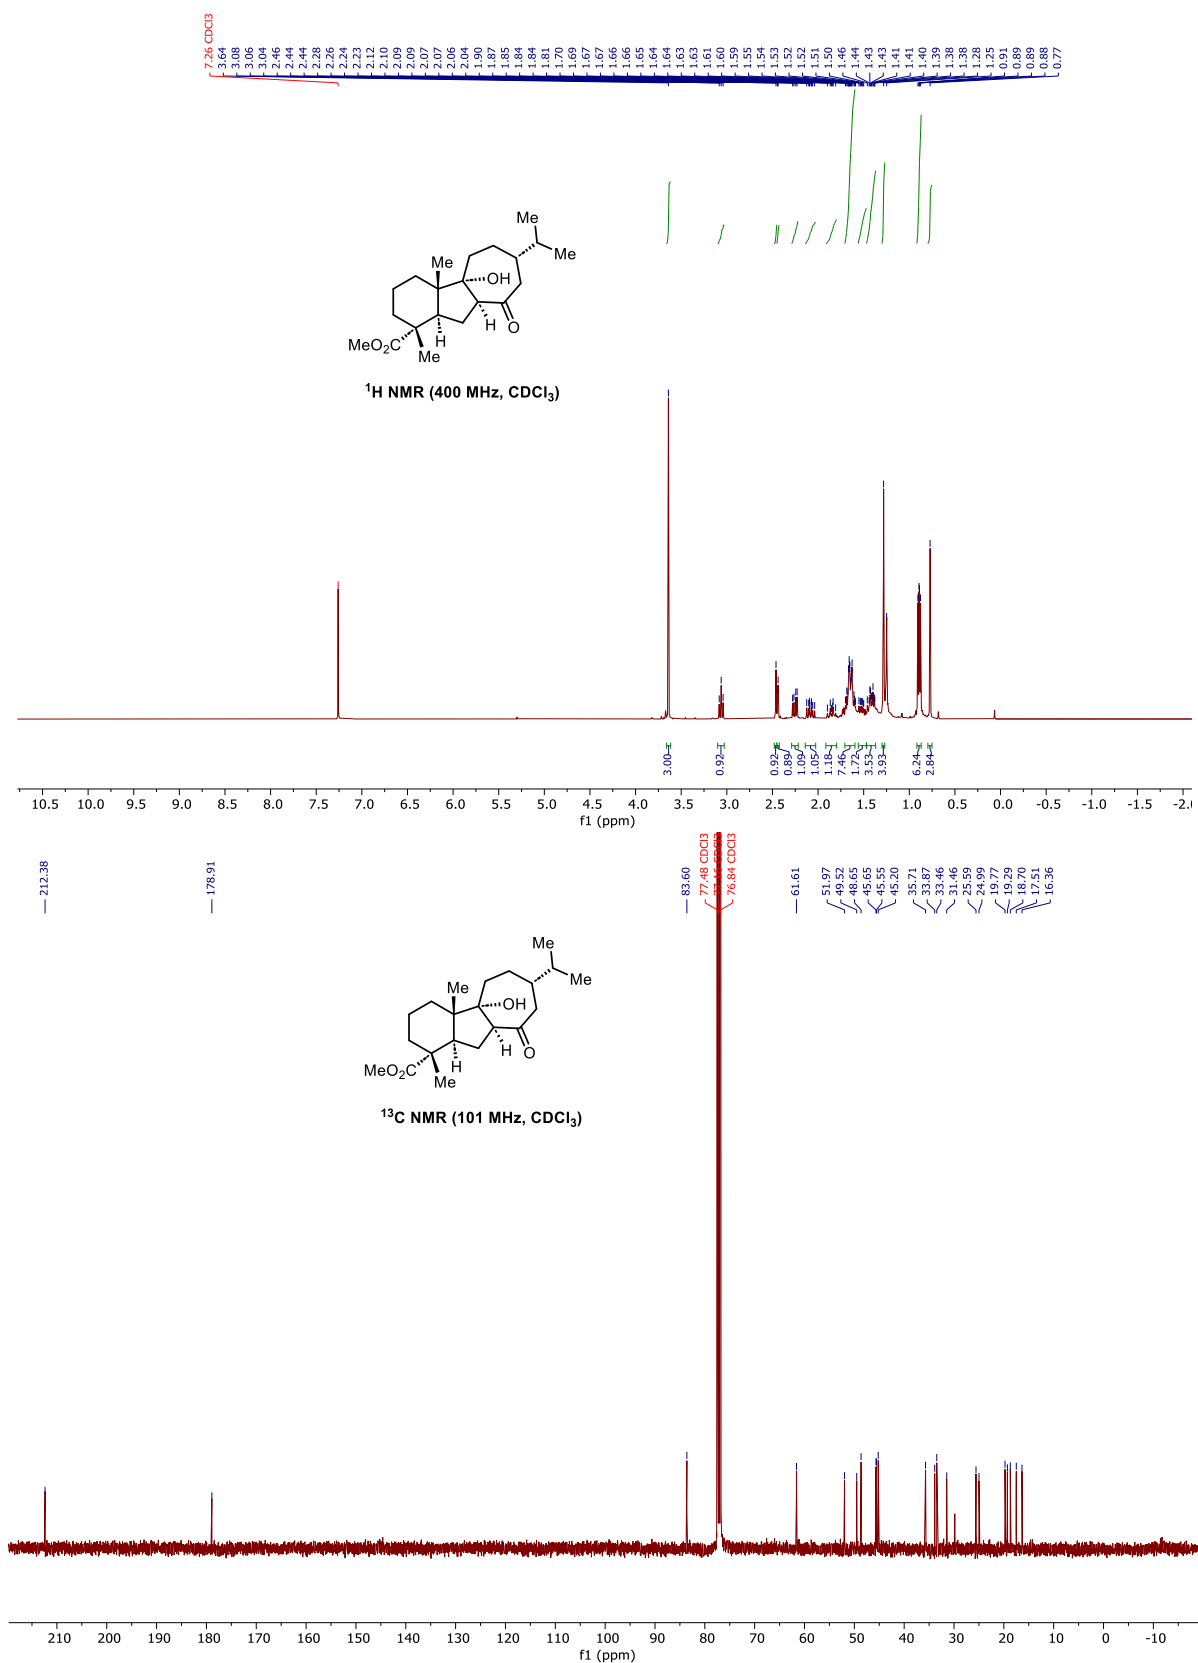

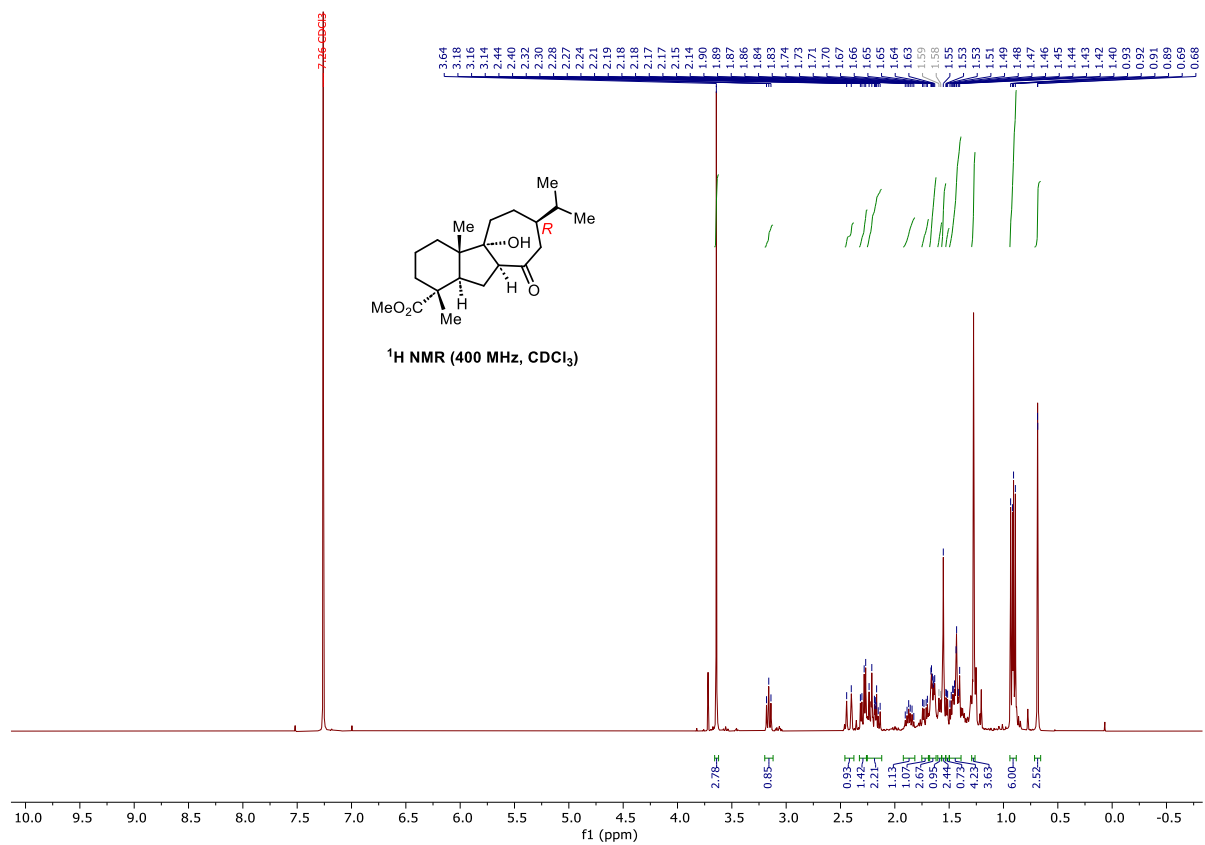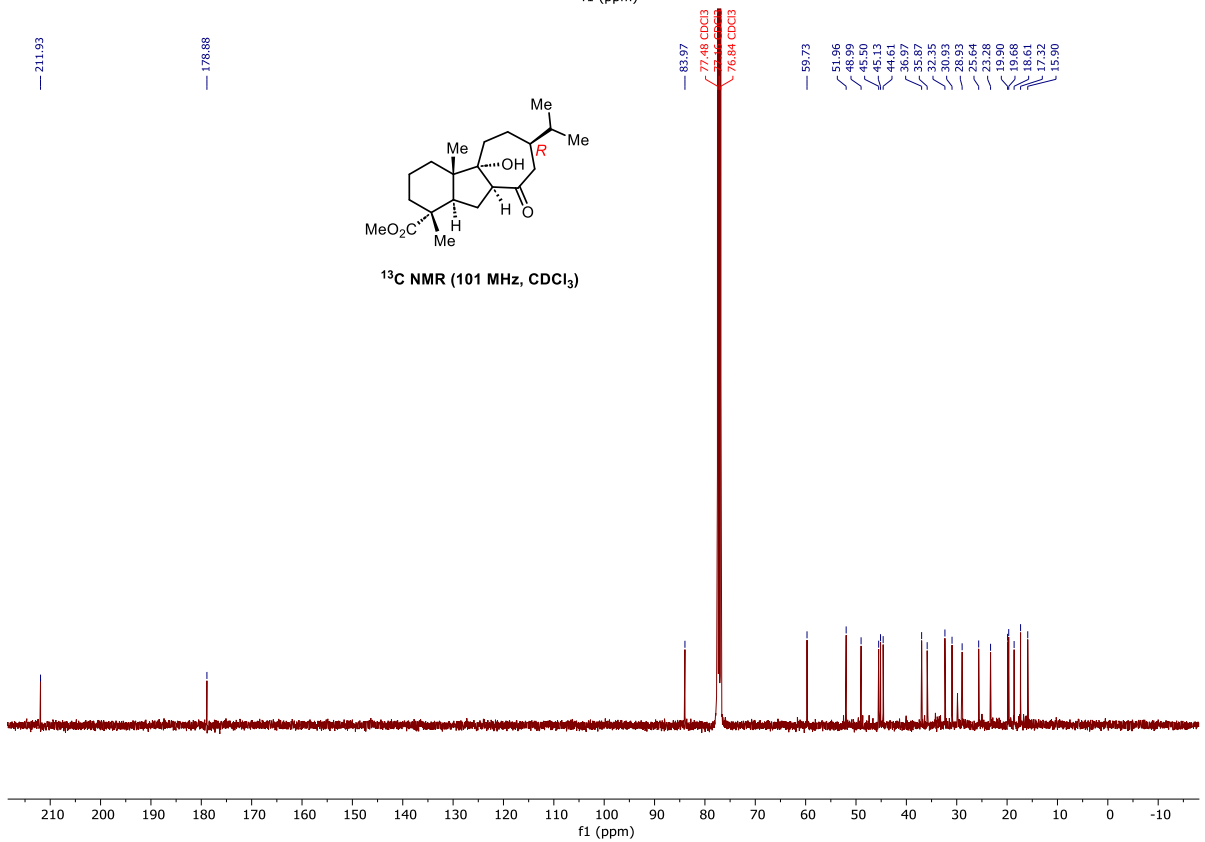

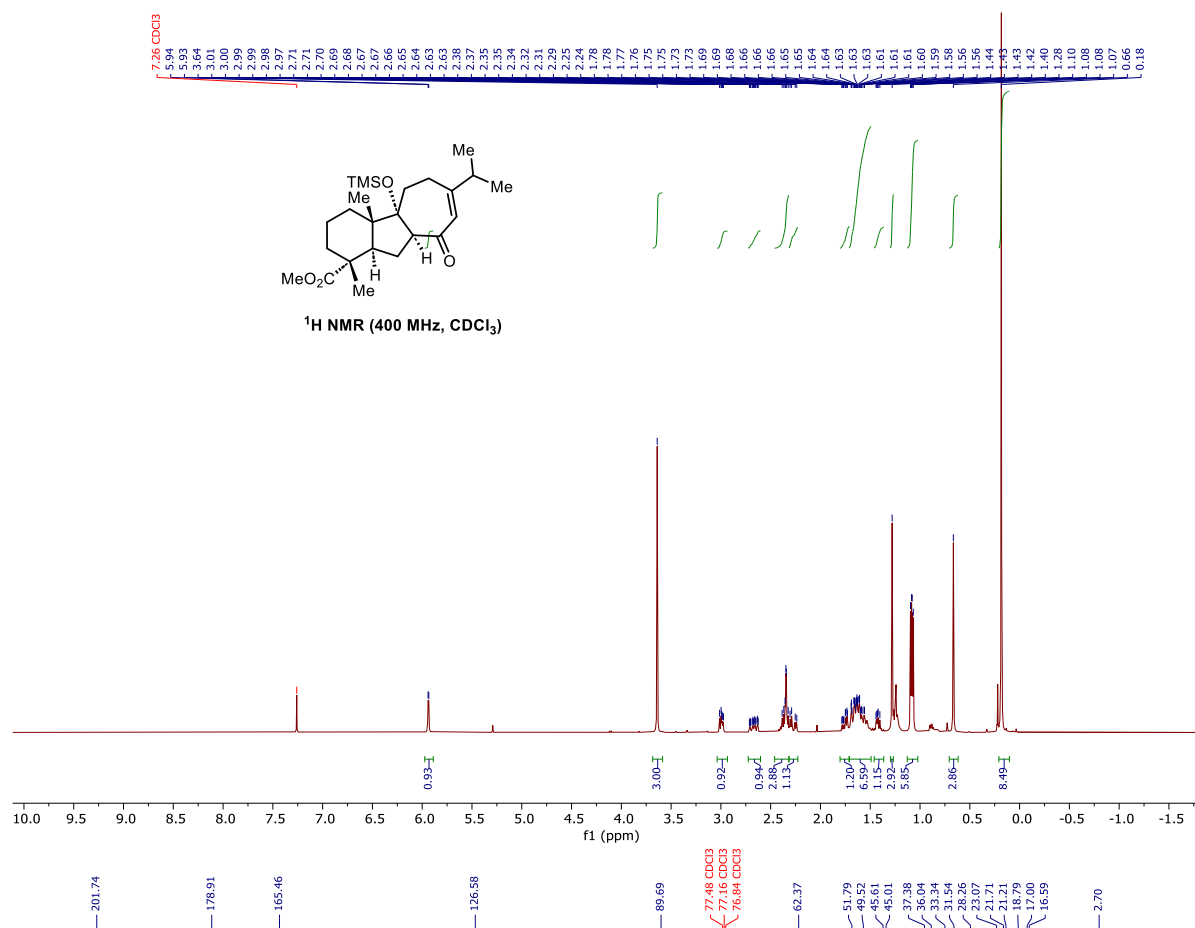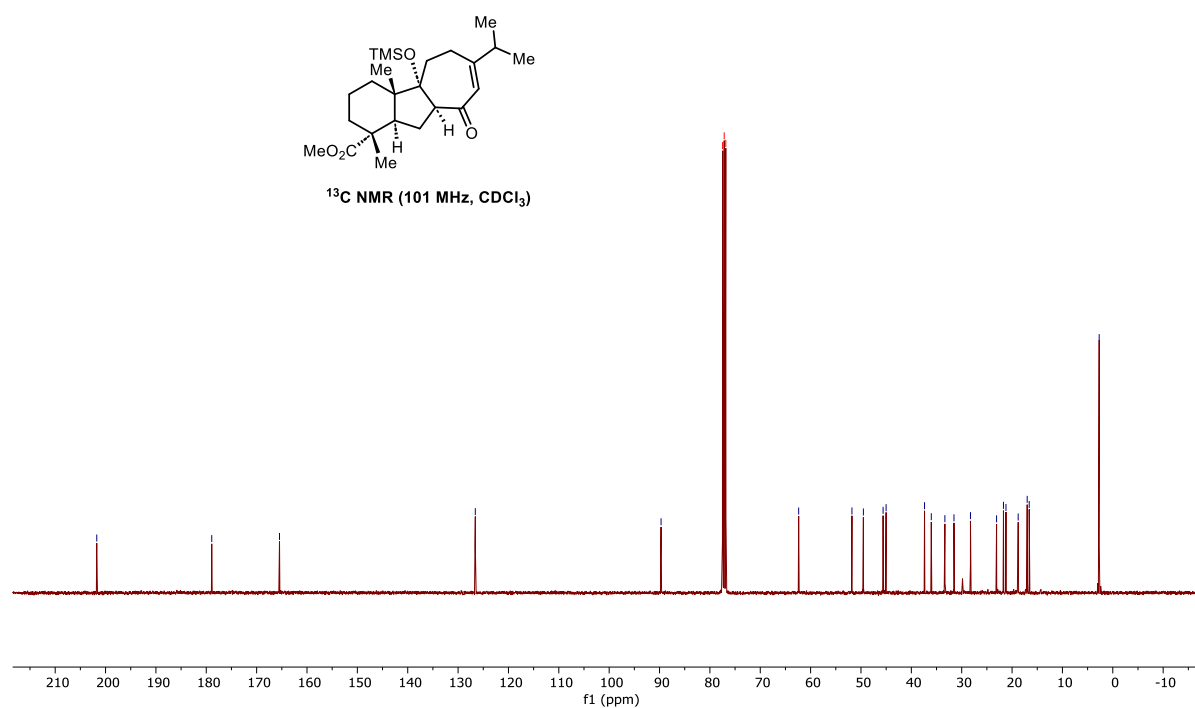

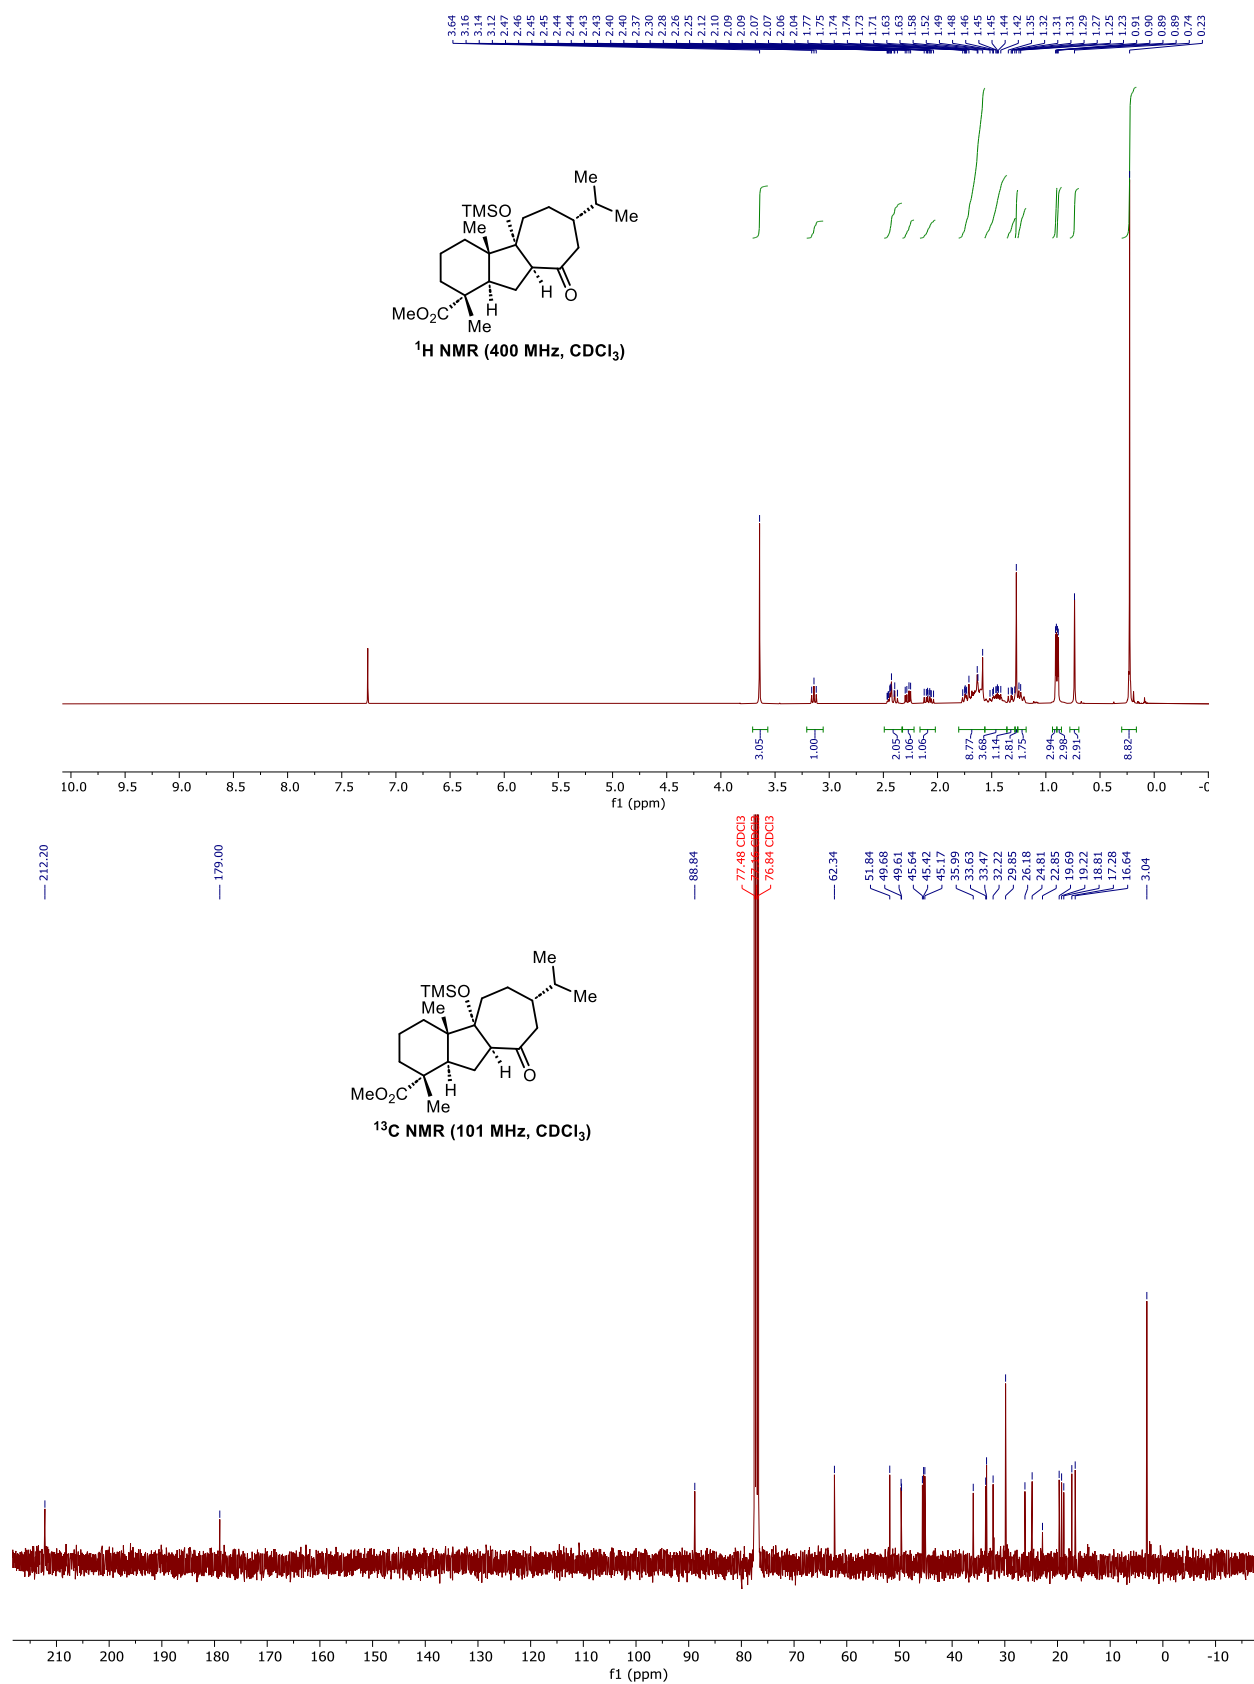

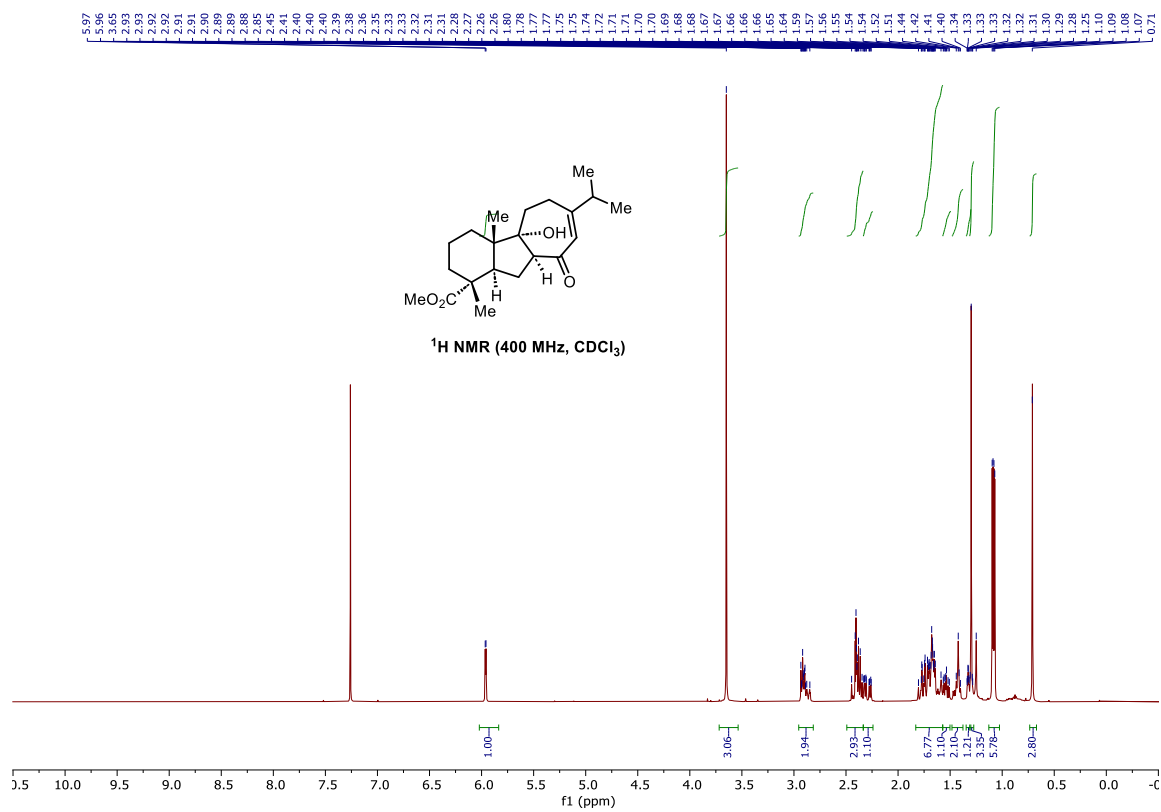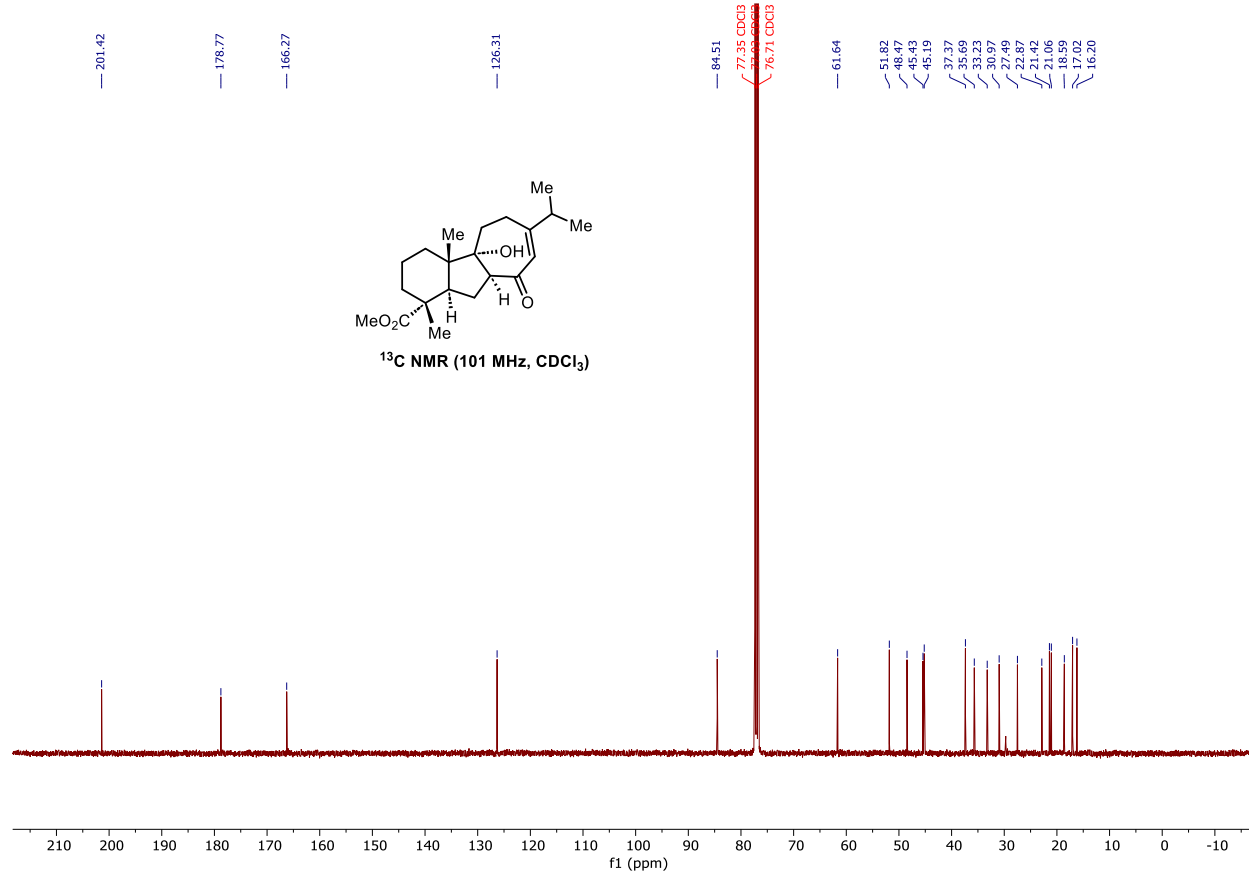

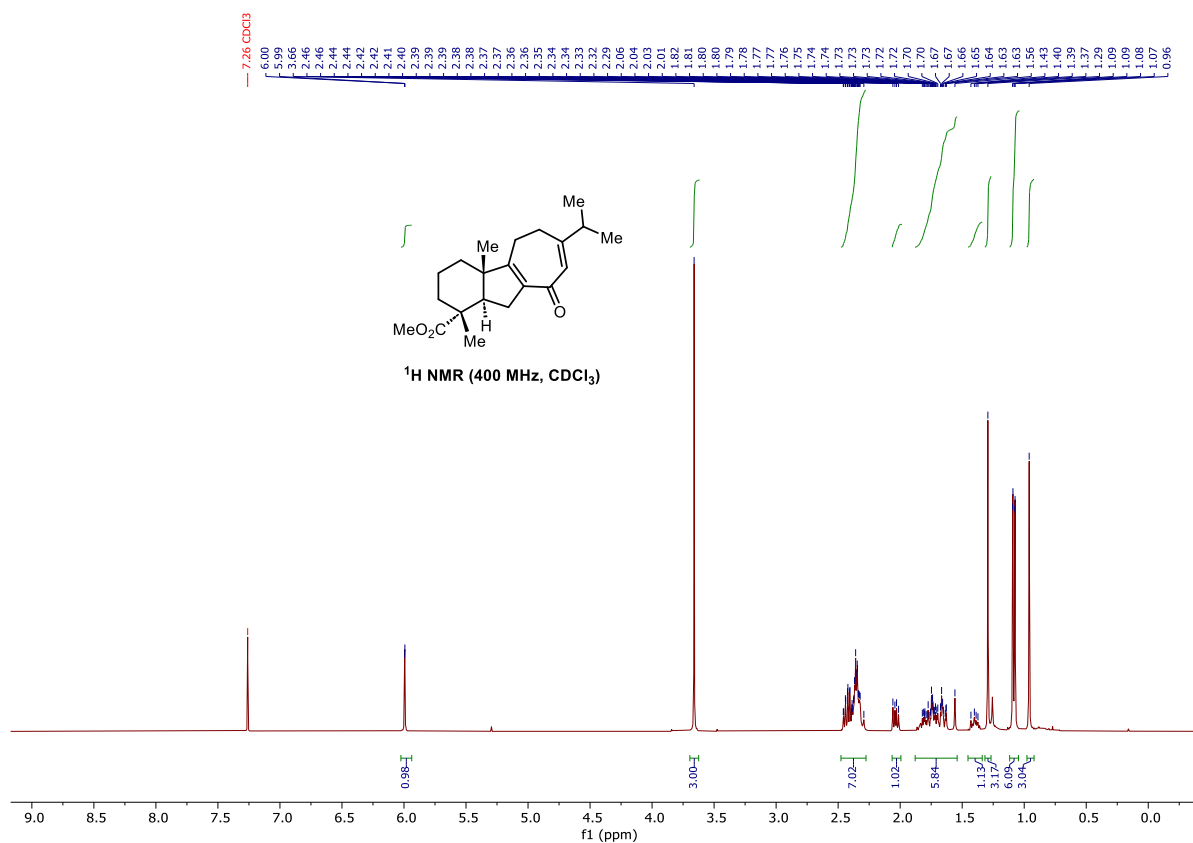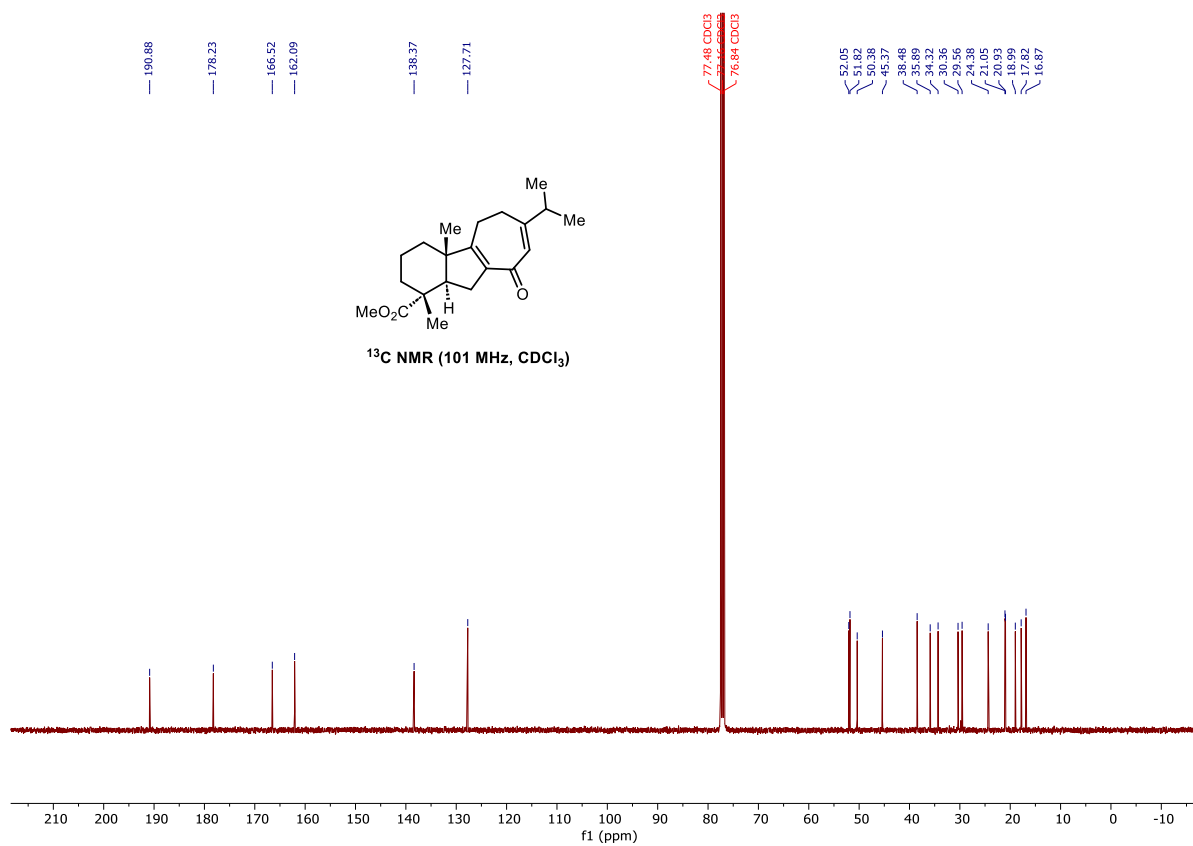

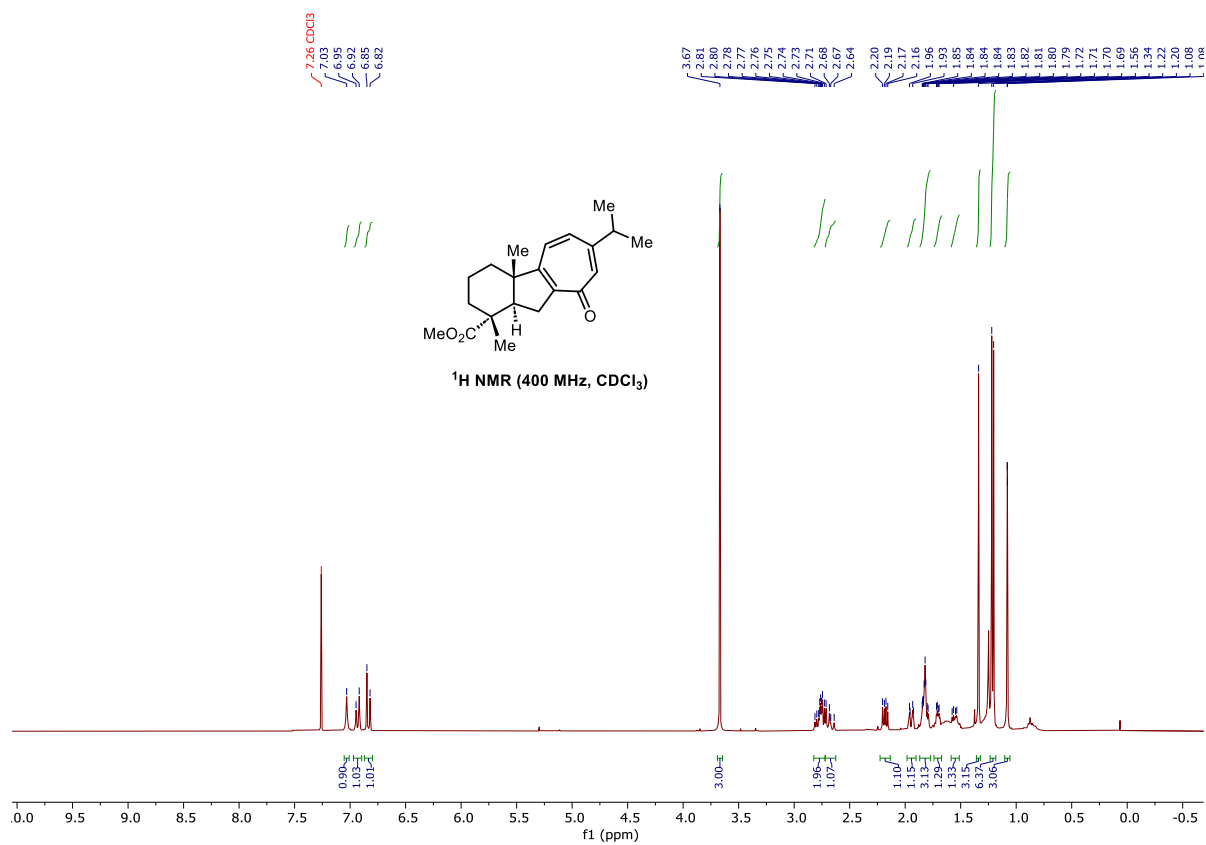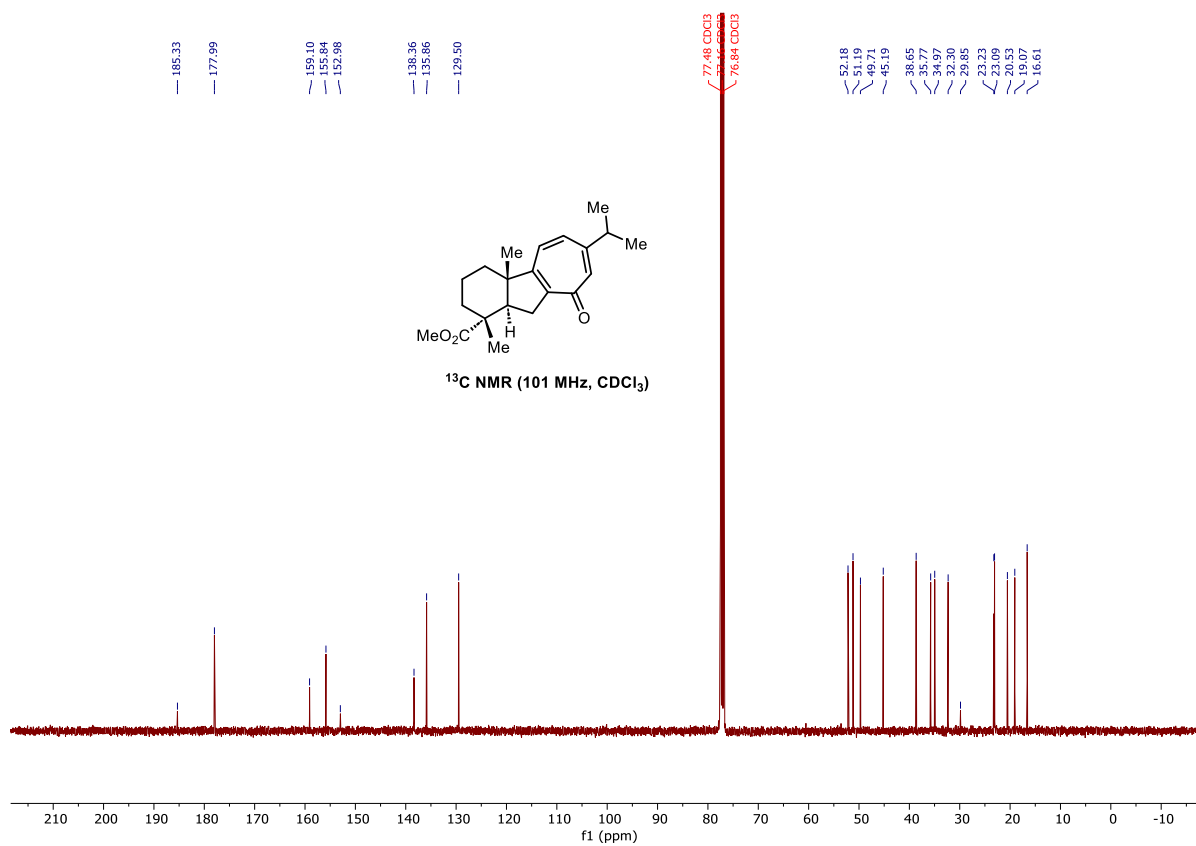

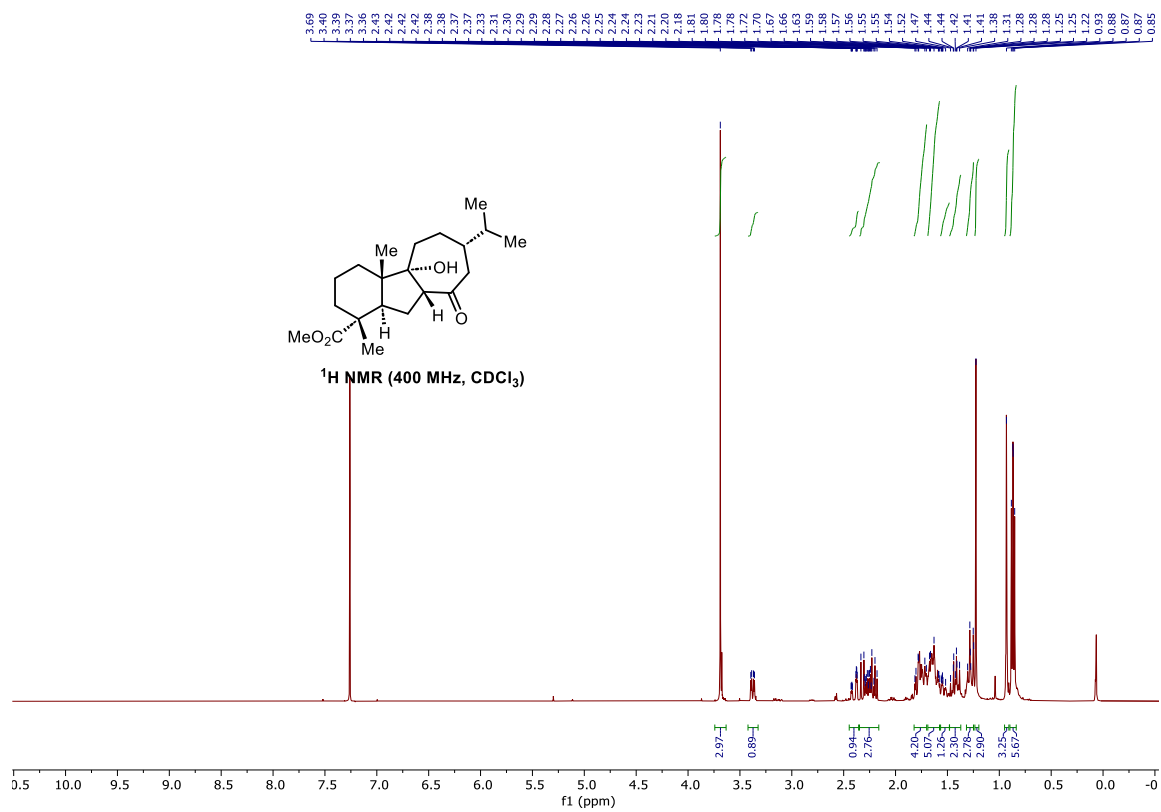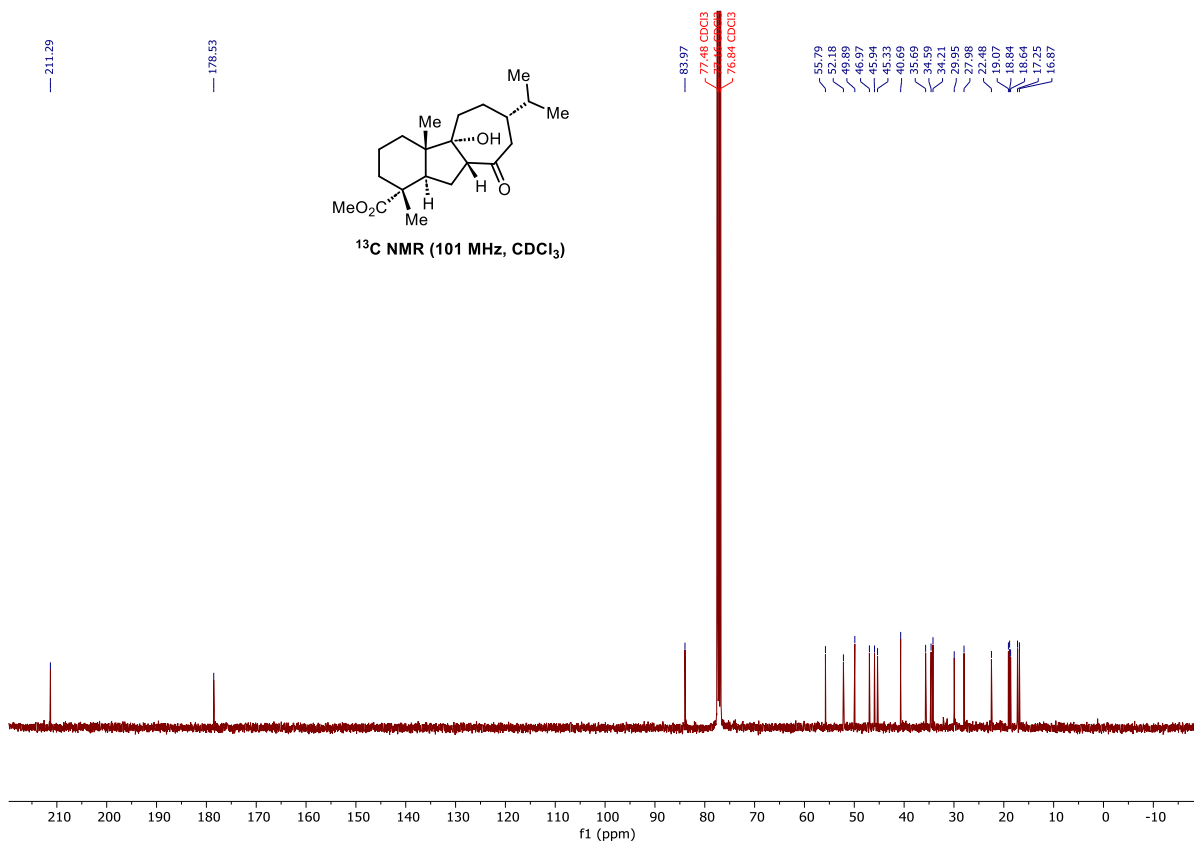

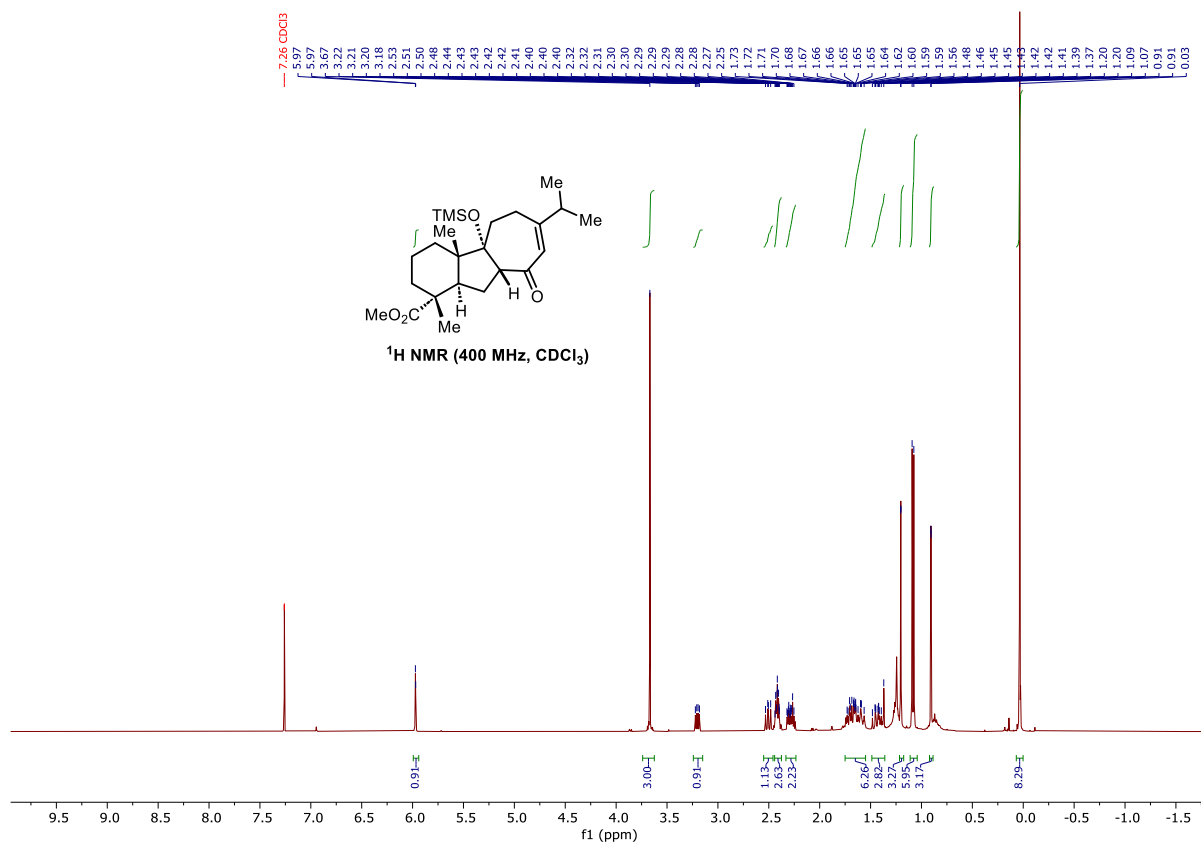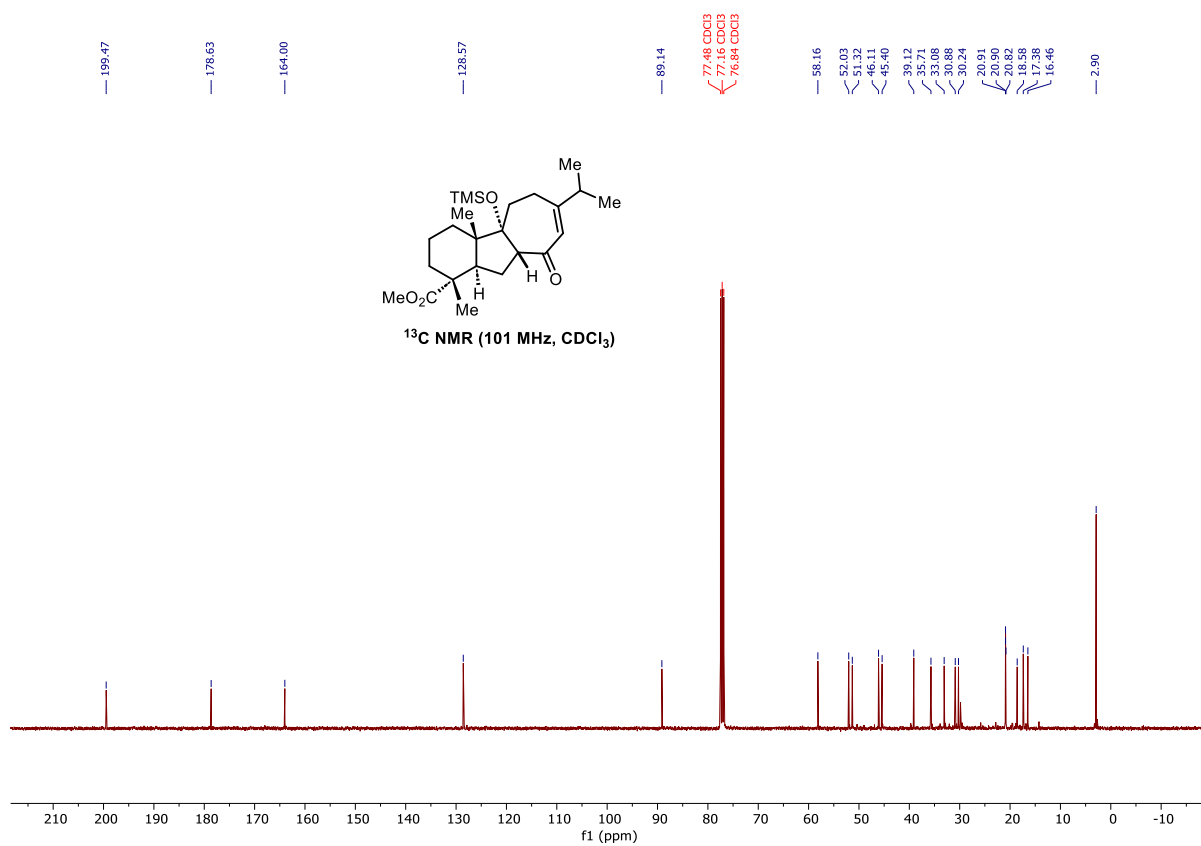

Supplement: CC-060-D4CC01462F-s001 [file CC-060-D4CC01462F-s001.pdf]
